# Supplementary material for: A sustainable waterborne vanillin–eugenol–acrylate miniemulsion with suitable antibacterial properties as a substitute for the styrene–acrylate emulsion
Source: Royal Society of Chemistry journal article supplement (doi:10.1039/d1gc01766g), 2021-01-01
Supplement: d1gc01766g1.pdf [file d1gc01766g1.pdf]

## **Sustainable Waterborne Vanillin-Eugenol-Acrylate Miniemulsion with Suitable Antibacterial Properties as Substitutes for Styrene- Acrylate Emulsion**

Lei Zhang<sup>a</sup>, Jianzhong Ma<sup>a\*</sup>, Bin Lyu<sup>a</sup>, Yuehong Zhang<sup>a\*</sup>, Vijay Kumar Thakur<sup>b\*</sup>

<sup>a</sup> College of Bioresources Chemical and Materials Engineering, Shaanxi University of Science and Technology, Shaanxi Province, Xi'an 710021, China

<sup>b</sup> Biorefining and Advanced Materials Research Centre, Scotland's Rural College, Scotland, Edinburgh EH9 3JG, United Kingdom

\*Corresponding author, E-mail addresses: [majz@sust.edu.cn](mailto:majz@sust.edu.cn),  
[yuehong.zhang@sust.edu.cn](mailto:yuehong.zhang@sust.edu.cn), [Vijay.Thakur@sruc.ac.uk](mailto:Vijay.Thakur@sruc.ac.uk)

## List of supplementary tables and figures

**Table S1.** Insoluble weight percent for P(DV-BA-DE) and P(St-BA-DAAM) system.

**Table S2.** Softness of the cured P(DV-BA-DE) latex film, uncoated leather and P(DV-BA-DE) miniemulsion coated leather.

**Fig. S1** The scratch-resistance of the leather coated with P(DV-BA-DE): (a) before test; (b) after test.

**Fig. S2** Schematic diagram of the molecular structure of P(DV-BA-DE) and P(St-BA-DE).

**Fig. S3** Antibacterial performance of the cured P(St-BA-DE) latex film: (a) cultivate *E. coli* for 24 h, (b) cultivate *S. aureus* for 24 h.

After extraction for 24 h with boiling ethyl acetate, the remaining insoluble fractions were considered to be incorporated into the insoluble crosslinked network structure. The results in Table S1 showed that the P(DV-BA-DE) system exhibited a higher curing degree, which insoluble weight percent was 96.8%. In sharp contrast, the insoluble weight percent of P(St-BA-DAAM) system was 28.3%, which was significantly lower than P(DV-BA-DE) system.

**Table S1.** Insoluble weight percent for P(DV-BA-DE) and P(St-BA-DAAM) system

| Polymer system | Insoluble weight percent (wt%) |
|----------------|--------------------------------|
| P(DV-BA-DE)    | 96.8 ± 0.3                     |
| P(St-BA-DAAM)  | 28.3 ± 0.1                     |

**Table S2.** Softness of the cured P(DV-BA-DE) latex film, uncoated leather and P(DV-BA-DE) miniemulsion coated leather

| Sample        | The cured P(DV-BA-DE) latex film | Uncoated leather | The P(DV-BA-DE) miniemulsion coated leather |
|---------------|----------------------------------|------------------|---------------------------------------------|
| Softness (mm) | 7.3 ± 0.2                        | 7.6 ± 0.5        | 7.8 ± 0.6                                   |

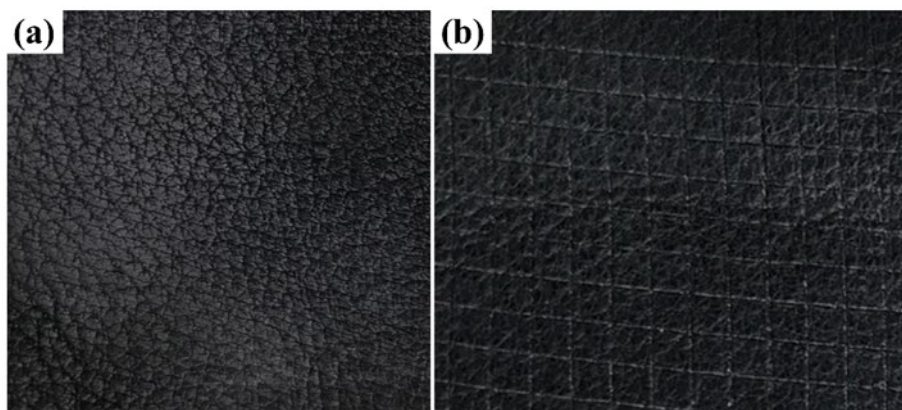

**Fig. S1** The scratch-resistance of the P(DV-BA-DE) miniemulsion coated leather: (a) before test, (b) after test.

The aldehyde-free aromatic rigid monomer styrene St was used to replace DV to prepare P(St-BA-DE). The schematic diagram of molecular structure of P(DV-BA-DE) and P(St-BA-DE) were shown in Fig S2.

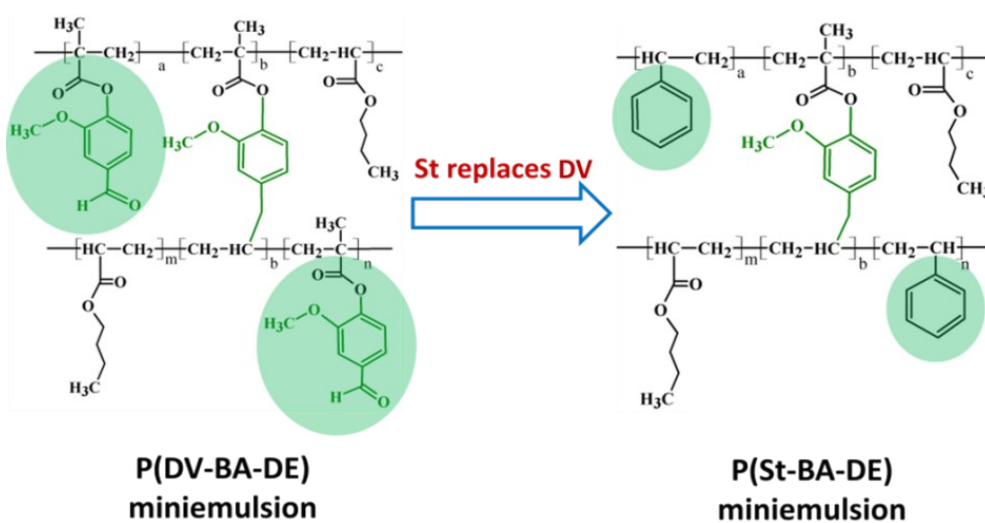

**Fig. S2** Schematic diagram of the molecular structure of P(DV-BA-DE) and P(St-BA-DE).

The cured P(St-BA-DE) latex film has non-obvious inhibition zone against *E. coli* (Fig. S3a) and *S. aureus* (Fig. S3b), indicating that it did not have antibacterial activity against *E. coli* and *S. aureus*.

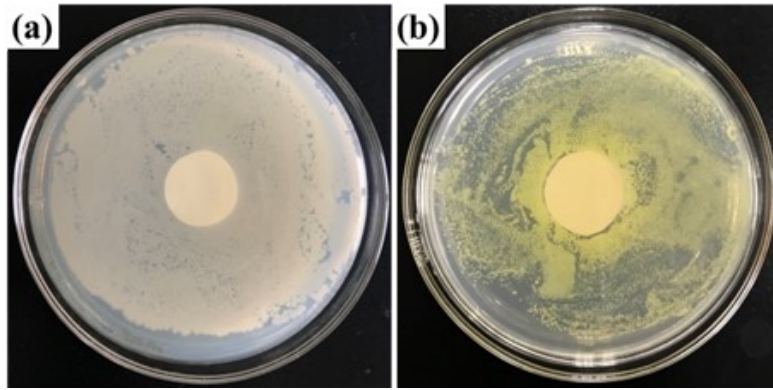

**Fig. S3** Antibacterial performance of the cured P(St-BA-DE) latex film: (a) cultivate *E. coli* for 24 h, (b) cultivate *S. aureus* for 24 h.
